# Supplementary material
Source: PubMed Central journal article supplement (PMC1482519)
Supplement: pnas_0602138103_2.pdf [file pnas_0602138103_2.pdf]

**Table 4. Mutations in genes which occurred during chronic airways infection in patient 1**

| Mutation no. in Fig. 1* | PAO1 annotation no. | Gene name (alternate gene name) | Gene function                                  | Functional category      | Type of mutation   | Nucleotide position mutated in gene | Nucleotide prior to mutation | Nucleotide after mutation | Amino acid prior to mutation | Amino acid after mutation | Computational prediction of effect on protein function <sup>†</sup> | Notes |
|-------------------------|---------------------|---------------------------------|------------------------------------------------|--------------------------|--------------------|-------------------------------------|------------------------------|---------------------------|------------------------------|---------------------------|---------------------------------------------------------------------|-------|
| m1                      | PA3565              |                                 | probable transcriptional regulator             |                          | synonymous         | 247                                 | C                            | T                         | L                            | L                         | -                                                                   |       |
| m2                      | PA3159              | <i>wbpA</i>                     | probable UDP-glucose/GDP-mannose dehydrogenase | virulence, O-antigen     | 1.6kb IS insertion | 811                                 | -                            | -                         | -                            | -                         | -                                                                   |       |
| m3                      | PA1713              | <i>exsA</i>                     | transcriptional regulator                      | virulence                | nonsynonymous      | 53                                  | A                            | G                         | N                            | S                         | Tolerated                                                           |       |
| m4                      | PA4848              | <i>accC</i>                     | biotin carboxylase                             | fatty-acid metabolism    | nonsynonymous      | 542                                 | C                            | T                         | S                            | L                         | Tolerated                                                           |       |
| m5                      | PA4525              | <i>pilA</i>                     | type 4 fimbrial precursor                      | virulence, motility      | 1.6kb IS insertion | 262                                 | -                            | -                         | -                            | -                         | -                                                                   |       |
| m6                      | PA2435              |                                 | probable cation-transporting P-type ATPase     | small-molecule transport | nonsynonymous      | 1835                                | T                            | C                         | L                            | P                         | Tolerated                                                           |       |
| m8                      | PA0707              | <i>toxR (regA)</i>              | transcriptional regulator                      | virulence regulator      | nonsynonymous      | 590                                 | A                            | T                         | N                            | I                         | None                                                                |       |

| Mutation no. in Fig. 1* | PAO1 annotation no.                 | Gene name (alternate gene name) | Gene function                                                                                | Functional category                 | Type of mutation | Nucleotide position mutated in gene | Nucleotide prior to mutation | Nucleotide after mutation | Amino acid prior to mutation | Amino acid after mutation | Computational prediction of effect on protein function <sup>†</sup> | Notes |
|-------------------------|-------------------------------------|---------------------------------|----------------------------------------------------------------------------------------------|-------------------------------------|------------------|-------------------------------------|------------------------------|---------------------------|------------------------------|---------------------------|---------------------------------------------------------------------|-------|
| m10                     | PA0425                              | <i>mexA</i>                     | Resistance-nodulation-cell division (RND) multidrug efflux membrane fusion protein precursor | small-molecule transport, virulence | nonsynonymous    | 497                                 | G                            | C                         | G                            | A                         | Not tolerated                                                       |       |
| m11                     | PA0366                              |                                 | probable aldehyde dehydrogenase                                                              |                                     | 1bp deletion     | 1383                                | CCCCCCC                      | CCCCCC                    | -                            | -                         | -                                                                   |       |
| m12                     | PA4420                              | ( <i>mraW yabC ylxA</i> )       | conserved hypothetical protein                                                               |                                     | synonymous       | 798                                 | G                            | T                         | L                            | L                         | -                                                                   |       |
| m13                     | PA0997                              | <i>pqsB</i>                     | Homologous to $\beta$ -keto-acyl-acyl-carrier protein synthase                               | quorum sensing                      | nonsynonymous    | 269                                 | C                            | T                         | A                            | V                         | None                                                                |       |
| m14                     | in 45-kb genomic island             | ( <i>P1-001</i> )               | hypothetical protein                                                                         |                                     | 1bp deletion     | 2845                                | GGGGGG<br>GG                 | GGGGGG<br>G               | -                            | -                         | -                                                                   |       |
| m15                     | in PAGI-3(SG) and PAGI-2(C) genomic | ( <i>C/SG114</i> )              | hypothetical protein                                                                         |                                     | 1bp deletion     | 398                                 | AA                           | A                         | -                            | -                         | -                                                                   |       |

| Mutation no. in Fig. 1* | PAO1 annotation no. | Gene name (alternate gene name) | Gene function                         | Functional category                    | Type of mutation | Nucleotide position mutated in gene | Nucleotide prior to mutation | Nucleotide after mutation | Amino acid prior to mutation | Amino acid after mutation | Computational prediction of effect on protein function <sup>†</sup> | Notes                                     |
|-------------------------|---------------------|---------------------------------|---------------------------------------|----------------------------------------|------------------|-------------------------------------|------------------------------|---------------------------|------------------------------|---------------------------|---------------------------------------------------------------------|-------------------------------------------|
|                         | island              |                                 |                                       |                                        |                  |                                     |                              |                           |                              |                           |                                                                     |                                           |
| m17                     | PA4796              |                                 | hypothetical protein                  |                                        | nonsynonymous    | 416                                 | G                            | A                         | R                            | H                         | Tolerated                                                           |                                           |
| m18                     | PA3817              |                                 | probable methyltransferase            |                                        | nonsynonymous    | 145                                 | C                            | T                         | R                            | W                         | Not tolerated                                                       |                                           |
| m19                     | PA2492              | <i>mexT</i>                     | transcriptional regulator             | regulation of small-molecule transport | nonsynonymous    | 708                                 | A                            | G                         | H                            | R                         | Not tolerated                                                       |                                           |
| m20                     | PA2491              | <i>mexS</i>                     | probable oxidoreductase               | small-molecule transport               | nonsynonymous    | 260                                 | C                            | T                         | A                            | V                         | Tolerated                                                           |                                           |
| m21                     | PA2161              |                                 | hypothetical protein                  |                                        | nonsynonymous    | 235                                 | G                            | A                         | A                            | T                         | None                                                                |                                           |
| m22                     | PA2020              | <i>mexZ</i> ( <i>amrR</i> )     | probable transcriptional regulator    | regulation of small-molecule transport | 11bp deletion    | 193                                 | GTCGCAC<br>ATCG              | -                         | -                            | -                         | -                                                                   |                                           |
| m23                     | PA1532              | <i>dnaX</i>                     | DNA polymerase subunits gamma and tau | DNA replication                        | 6bp insertion    | 1375                                | -                            | CCGAGC                    | -                            | -                         | -                                                                   | Inserts 1 copy into 12 existing copies of |

| Mutation no. in Fig. 1* | PAO1 annotation no.         | Gene name (alternate gene name) | Gene function                               | Functional category                              | Type of mutation | Nucleotide position mutated in gene | Nucleotide prior to mutation | Nucleotide after mutation | Amino acid prior to mutation | Amino acid after mutation | Computational prediction of effect on protein function <sup>†</sup> | Notes            |
|-------------------------|-----------------------------|---------------------------------|---------------------------------------------|--------------------------------------------------|------------------|-------------------------------------|------------------------------|---------------------------|------------------------------|---------------------------|---------------------------------------------------------------------|------------------|
|                         |                             |                                 |                                             |                                                  |                  |                                     |                              |                           |                              |                           |                                                                     | repeat<br>CCGAGC |
| m24                     | PA1430                      | <i>lasR</i>                     | transcriptional regulator of quorum sensing | virulence, quorum sensing                        | 1bp deletion     | 147                                 | C                            | -                         | -                            | -                         | -                                                                   |                  |
| m25                     | PA1333                      |                                 | hypothetical protein                        |                                                  | synonymous       | 99                                  | C                            | T                         | A                            | A                         | -                                                                   |                  |
| m26                     | PA0313                      | ( <i>yecS</i> )                 | probable permease of ABC transporter        | small-molecule transport                         | nonsynonymous    | 424                                 | A                            | C                         | T                            | P                         | Not tolerated                                                       |                  |
| m27                     | in pKLC102 genomic island   | <i>chvB</i>                     | cyclic beta-1,2-glucan biosynthesis protein | virulence, osmotic balance, motility, attachment | 1bp deletion     | 2428                                | CCCCCCC<br>C                 | CCCCCCC                   | -                            | -                         | -                                                                   |                  |
| m28                     | in PAGI-2(C) genomic island | ( <i>C71</i> )                  | putative RNA/DNA helicase                   | transcription                                    | synonymous       | 1281                                | C                            | T                         | A                            | A                         | -                                                                   |                  |
| m29                     | PA5238                      |                                 | probable O-antigen                          | virulence,                                       | nonsynonymous    | 1585                                | C                            | T                         | Q                            | STOP                      | -                                                                   |                  |

| Mutation no. in Fig. 1* | PAO1 annotation no. | Gene name (alternate gene name) | Gene function                        | Functional category | Type of mutation | Nucleotide position mutated in gene | Nucleotide prior to mutation | Nucleotide after mutation | Amino acid prior to mutation | Amino acid after mutation | Computational prediction of effect on protein function <sup>†</sup> | Notes |
|-------------------------|---------------------|---------------------------------|--------------------------------------|---------------------|------------------|-------------------------------------|------------------------------|---------------------------|------------------------------|---------------------------|---------------------------------------------------------------------|-------|
|                         |                     |                                 | acetylase                            | O-antigen           | (nonsense)       |                                     |                              |                           |                              |                           |                                                                     |       |
| m30                     | PA5005              |                                 | probable carbamoyl transferase       |                     | nonsynonymous    | 1123                                | C                            | T                         | P                            | S                         | Not tolerated                                                       |       |
| m31                     | PA4707              | <i>(phuU)</i>                   | probable permease of ABC transporter | iron transport      | nonsynonymous    | 460                                 | G                            | A                         | A                            | T                         | Not tolerated                                                       |       |
| m32                     | PA4580              |                                 | conserved hypothetical protein       |                     | synonymous       | 426                                 | C                            | T                         | S                            | S                         | -                                                                   |       |
| m33                     | PA4477              | <i>cafA</i>                     | cytoplasmic axial filament protein   | cell division       | 1bp deletion     | 273                                 | GGGG                         | GGG                       | -                            | -                         | -                                                                   |       |
| m36                     | PA4217              | <i>phzS</i>                     | flavin-containing monooxygenase      | virulence           | nonsynonymous    | 1106                                | A                            | G                         | E                            | G                         | Tolerated                                                           |       |
| m37                     | PA3620              | <i>mutS (fdv)</i>               | DNA mismatch repair protein          | mutator             | nonsynonymous    | 1469                                | G                            | T                         | R                            | L                         | Not tolerated                                                       |       |
| m38                     | PA3574              |                                 | probable transcriptional regulator   |                     |                  | 77                                  | AAAA                         | AAA                       | -                            | -                         | -                                                                   |       |
| m39                     | PA3270              |                                 | hypothetical protein                 |                     | synonymous       | 336                                 | C                            | T                         | N                            | N                         | -                                                                   |       |
| m40                     | PA3254              |                                 | probable ATP-                        | small-              | nonsynonymous    | 761                                 | C                            | T                         | A                            | V                         | Tolerated                                                           |       |

| Mutation no. in Fig. 1* | PAO1 annotation no. | Gene name (alternate gene name) | Gene function                                            | Functional category        | Type of mutation | Nucleotide position mutated in gene | Nucleotide prior to mutation | Nucleotide after mutation | Amino acid prior to mutation | Amino acid after mutation | Computational prediction of effect on protein function <sup>†</sup> | Notes |
|-------------------------|---------------------|---------------------------------|----------------------------------------------------------|----------------------------|------------------|-------------------------------------|------------------------------|---------------------------|------------------------------|---------------------------|---------------------------------------------------------------------|-------|
|                         |                     |                                 | binding component of ABC transporter                     | molecule transport         |                  |                                     |                              |                           |                              |                           |                                                                     |       |
| m41                     | PA3170              |                                 | conserved hypothetical protein                           |                            | 1bp insertion    | 1306                                | GGGGGG                       | GGGGGG<br>G               | -                            | -                         | -                                                                   |       |
| m42                     | PA2958              |                                 | hypothetical protein                                     |                            | nonsynonymous    | 458                                 | T                            | C                         | V                            | A                         | Not tolerated                                                       |       |
| m43                     | PA2744              | <i>thrS</i>                     | threonyl-tRNA synthetase                                 |                            | synonymous       | 1857                                | C                            | T                         | P                            | P                         | -                                                                   |       |
| m44                     | PA2426              | <i>pvdS</i>                     | sigma factor                                             | iron regulation, virulence | nonsynonymous    | 196                                 | T                            | C                         | Y                            | H                         | Not tolerated                                                       |       |
| m45                     | PA2092              |                                 | probable major facilitator superfamily (MFS) transporter | small-molecule transport   | nonsynonymous    | 1058                                | C                            | G                         | A                            | G                         | Tolerated                                                           |       |
| m46                     | PA1910              | <i>(ufrA)</i>                   | probable tonB-dependent receptor protein                 | iron transport             | nonsynonymous    | 1466                                | T                            | C                         | M                            | T                         | Tolerated                                                           |       |
| m48                     | PA1112              | <i>(yilI)</i>                   | conserved hypothetical protein                           |                            | nonsynonymous    | 688                                 | G                            | C                         | A                            | P                         | Not tolerated                                                       |       |

| Mutation no. in Fig. 1* | PAO1 annotation no.                         | Gene name (alternate gene name) | Gene function                          | Functional category   | Type of mutation         | Nucleotide position mutated in gene | Nucleotide prior to mutation | Nucleotide after mutation | Amino acid prior to mutation | Amino acid after mutation | Computational prediction of effect on protein function <sup>†</sup> | Notes                                   |
|-------------------------|---------------------------------------------|---------------------------------|----------------------------------------|-----------------------|--------------------------|-------------------------------------|------------------------------|---------------------------|------------------------------|---------------------------|---------------------------------------------------------------------|-----------------------------------------|
| m49                     | PA1032                                      | ( <i>pac</i> )                  | probable penicillin amidase            | antibiotic resistance | 1bp deletion             | 541                                 | C                            | -                         | -                            | -                         | -                                                                   |                                         |
| m52                     | PA0081                                      |                                 | hypothetical protein                   |                       | 54bp deletion            | 837                                 | -                            | -                         | -                            | -                         | -                                                                   | Deletes 9 of 17 copies of repeat GGCTGT |
| m53                     | in PAGI-3(SG) and PAGI-2(C) genomic islands | ( <i>C/SG117</i> )              | hypothetical protein                   |                       | synonymous               | 468                                 | C                            | T                         | G                            | G                         | -                                                                   |                                         |
| m54                     | PA4999                                      |                                 | hypothetical protein                   |                       | nonsynonymous            | 851                                 | G                            | T                         | G                            | V                         | Not tolerated                                                       |                                         |
| m55                     | PA4270                                      | <i>rpoB</i>                     | DNA-directed RNA polymerase beta chain | transcription         | nonsynonymous            | 1562                                | A                            | G                         | D                            | G                         | Not tolerated                                                       |                                         |
| m56                     | PA4251                                      | <i>rplE</i>                     | 50S ribosomal protein L5               | translation           | nonsynonymous            | 89                                  | G                            | A                         | R                            | H                         | Not tolerated                                                       |                                         |
| m57                     | PA3974                                      |                                 | probable two-component sensor          |                       | nonsynonymous (nonsense) | 1105                                | C                            | T                         | Q                            | STOP                      | -                                                                   |                                         |

| Mutation no. in Fig. 1* | PAO1 annotation no.             | Gene name (alternate gene name) | Gene function                             | Functional category                              | Type of mutation | Nucleotide position mutated in gene | Nucleotide prior to mutation | Nucleotide after mutation | Amino acid prior to mutation | Amino acid after mutation | Computational prediction of effect on protein function <sup>†</sup> | Notes                     |
|-------------------------|---------------------------------|---------------------------------|-------------------------------------------|--------------------------------------------------|------------------|-------------------------------------|------------------------------|---------------------------|------------------------------|---------------------------|---------------------------------------------------------------------|---------------------------|
| m58                     | PA3974                          |                                 | probable two-component sensor             |                                                  | nonsynonymous    | 2306                                | C                            | A                         | A                            | D                         | Not tolerated                                                       |                           |
| m59                     | PA3875                          | <i>narG</i>                     | respiratory nitrate reductase alpha chain | anaerobic growth                                 | nonsynonymous    | 1420                                | G                            | T                         | A                            | S                         | Tolerated                                                           |                           |
| m60                     | PA3522                          |                                 | probable RND efflux transporter           | small-molecule transport                         | 3bp deletion     | 1062                                | GTGGTGG<br>TGGTGGT<br>G      | GTGGTGG<br>TGGTG          | -                            | -                         | -                                                                   |                           |
| m61                     | Deletion spans PA2272 to PA2410 |                                 | -                                         | iron transport, small-molecule transport, others | 188kb deletion   | 1649                                | -                            | -                         | -                            | -                         | -                                                                   | Deletes pyoverdine region |
| m62                     | PA2191                          | <i>exoY</i>                     | adenylate cyclase                         | virulence                                        | 1bp deletion     | 727                                 | CCCCCC                       | CCCCC                     | -                            | -                         | -                                                                   |                           |
| m63                     | PA2018                          | <i>(mexH;mexY;amrB)</i>         | RND multidrug efflux transporter          | small-molecule transport                         | nonsynonymous    | 860                                 | G                            | C                         | G                            | A                         | Tolerated                                                           |                           |
| m64                     | PA1737                          | <i>(fadB)</i>                   | probable 3-hydroxyacyl-CoA                | fatty-acid metabolism                            | 3bp deletion     | 444                                 | CGG                          | -                         | -                            | -                         | -                                                                   |                           |



| Mutation no. in Fig. 1* | PAO1 annotation no. | Gene name (alternate gene name) | Gene function                    | Functional category                 | Type of mutation         | Nucleotide position mutated in gene | Nucleotide prior to mutation | Nucleotide after mutation | Amino acid prior to mutation | Amino acid after mutation | Computational prediction of effect on protein function <sup>†</sup> | Notes                                          |
|-------------------------|---------------------|---------------------------------|----------------------------------|-------------------------------------|--------------------------|-------------------------------------|------------------------------|---------------------------|------------------------------|---------------------------|---------------------------------------------------------------------|------------------------------------------------|
|                         |                     |                                 | dehydrogenase                    |                                     |                          |                                     |                              |                           |                              |                           |                                                                     |                                                |
| m65                     | PA1713              | <i>exsA</i>                     | transcriptional regulator        | virulence                           | nonsynonymous            | 638                                 | C                            | T                         | P                            | L                         | Tolerated                                                           |                                                |
| m66                     | PA0426              | <i>mexB</i>                     | RND multidrug efflux transporter | small-molecule transport, virulence | nonsynonymous (nonsense) | 1762                                | C                            | T                         | Q                            | STOP                      | -                                                                   |                                                |
| m67                     | PA0004              | <i>gyrB</i>                     | DNA gyrase subunit B             | DNA replication                     | nonsynonymous            | 1404                                | G                            | T                         | E                            | D                         | Not tolerated                                                       |                                                |
| m68                     | PA4642              |                                 | hypothetical protein             |                                     | 2bp insertion            | 91                                  | CCCCCCC<br>C                 | CCCCCCC<br>CCC            | -                            | -                         | -                                                                   |                                                |
| s1                      | PA0081              |                                 | hypothetical protein             |                                     | 24bp deletion            | 837                                 | -                            | -                         | -                            | -                         | -                                                                   | Deletes 4 of 17 copies of repeat GGCTGT        |
| s2                      | PA0081              |                                 | hypothetical protein             |                                     | 6bp insertion            | 837                                 | -                            | -                         | -                            | -                         | -                                                                   | Inserts 1 copy into 17 copies of repeat GGCTGT |

| Mutation no. in Fig. 1* | PAO1 annotation no. | Gene name (alternate gene name) | Gene function                         | Functional category       | Type of mutation | Nucleotide position mutated in gene | Nucleotide prior to mutation | Nucleotide after mutation | Amino acid prior to mutation | Amino acid after mutation | Computational prediction of effect on protein function <sup>†</sup> | Notes                                   |
|-------------------------|---------------------|---------------------------------|---------------------------------------|---------------------------|------------------|-------------------------------------|------------------------------|---------------------------|------------------------------|---------------------------|---------------------------------------------------------------------|-----------------------------------------|
| s3                      | PA1430              | <i>lasR</i>                     | transcriptional regulator             | virulence, quorum sensing | nonsynonymous    | 199                                 | G                            | C                         | A                            | P                         | Tolerated                                                           |                                         |
| s4                      | PA0763              | <i>mucA</i>                     | anti-sigma factor                     | mucoidy                   | 1bp deletion     | 430                                 | G                            | -                         | -                            | -                         | -                                                                   |                                         |
| s5                      | PA0081              |                                 | hypothetical protein                  |                           | 12bp deletion    | 837                                 | -                            | -                         | -                            | -                         | -                                                                   | Deletes 2 of 17 copies of repeat GGCTGT |
| s6                      | PA0081              |                                 | hypothetical protein                  |                           | 6bp deletion     | 837                                 | -                            | -                         | -                            | -                         | -                                                                   | Deletes 1 of 17 copies of repeat GGCTGT |
| s7                      | PA1532              | <i>dnaX</i>                     | DNA polymerase subunits gamma and tau | DNA replication           | 6bp deletion     | 1375                                | CCGAGC                       | -                         | -                            | -                         | -                                                                   | Deletes 1 of 12 copies of repeat TCGGGC |
| s8                      | PA0763              | <i>mucA</i>                     | anti-sigma factor                     | mucoidy                   | 1bp deletion     | 357                                 | G                            | -                         | -                            | -                         | -                                                                   |                                         |
| s9                      | PA0081              |                                 | hypothetical protein                  |                           | 12bp deletion    | 837                                 | -                            | -                         | -                            | -                         | -                                                                   | Deletes 2 of 17 copies of repeat GGCTGT |

| Mutation no. in Fig. 1* | PAO1 annotation no. | Gene name (alternate gene name) | Gene function                      | Functional category      | Type of mutation | Nucleotide position mutated in gene | Nucleotide prior to mutation | Nucleotide after mutation | Amino acid prior to mutation | Amino acid after mutation | Computational prediction of effect on protein function <sup>†</sup> | Notes                                   |
|-------------------------|---------------------|---------------------------------|------------------------------------|--------------------------|------------------|-------------------------------------|------------------------------|---------------------------|------------------------------|---------------------------|---------------------------------------------------------------------|-----------------------------------------|
| s10                     | PA2491              | <i>mexS</i>                     | probable oxidoreductase            | small-molecule transport | nonsynonymous    | 479                                 | C                            | T                         | P                            | L                         | Tolerated                                                           |                                         |
| s11                     | PA0081              |                                 | hypothetical protein               |                          | 12bp deletion    | 837                                 | -                            | -                         | -                            | -                         | -                                                                   | Deletes 2 of 17 copies of repeat GGCTGT |
| s13                     | PA3244              | <i>minD</i>                     | cell division inhibitor            | cell division            | nonsynonymous    | 166                                 | G                            | A                         | V                            | M                         | Not tolerated                                                       |                                         |
| s14                     | PA0081              |                                 | hypothetical protein               |                          | 30bp deletion    | 837                                 | -                            | -                         | -                            | -                         | -                                                                   | Deletes 5 of 17 copies of repeat GGCTGT |
| s15                     | PA2312              |                                 | probable transcriptional regulator |                          | 1bp insertion    | 396                                 | CCCCC                        | CCCCCC                    | -                            | -                         | -                                                                   |                                         |
| s16                     | PA0763              | <i>mucA</i>                     | anti-sigma factor                  | mucoidy                  | 1bp deletion     | 420                                 | AA                           | A                         | -                            | -                         | -                                                                   |                                         |
| s17                     | PA4642              |                                 | hypothetical protein               |                          | 1bp insertion    | 91                                  | CCCCCCC<br>C                 | CCCCCCC<br>CC             | -                            | -                         | -                                                                   |                                         |

IS, insertion element.

\*Mutations present in the 96-month isolate, 35, are numbered m1–m68, and mutations present only in intermediate isolates are numbered s1–s17.

†Nonsynonymous mutations that are predicted to cause partial or complete loss of function are labeled “Not tolerated.” No prediction was made when fewer than four homologs were available.
