# Supplementary material
Source: PubMed Central journal article supplement (PMC1482519)
Supplement: pnas_0602138103_3.pdf [file pnas_0602138103_3.pdf]

**Table 5. Intergenic mutations that occurred during chronic airways infection in patient 1**

| Mutation no. in Fig. 1* | PAO1 annotation no. with 5' untranslated region containing the mutation <sup>†</sup> | Gene name (alternate gene name) | Gene function                                       | Functional category   | Type of mutation           | Distance from mutation to transcription start site of gene, bp | Nucleotide prior to mutation | Nucleotide after mutation | Notes                 |
|-------------------------|--------------------------------------------------------------------------------------|---------------------------------|-----------------------------------------------------|-----------------------|----------------------------|----------------------------------------------------------------|------------------------------|---------------------------|-----------------------|
| m7                      | PA3476                                                                               | <i>rhII</i>                     | autoinducer synthesis protein                       | quorum sensing        | intergenic SNP             | 50                                                             | A                            | C                         |                       |
| m9                      | PA0506                                                                               |                                 | probable acyl-CoA dehydrogenase                     | fatty-acid metabolism |                            | 24                                                             | A                            | G                         |                       |
| m16                     | PA4937.1                                                                             |                                 | tRNA-Leu                                            | tRNA                  | intergenic 216bp insertion | 293                                                            | -                            | -                         | Duplicates a tRNA-Leu |
| m34                     | PA4277.1                                                                             |                                 | tRNA-Thr                                            | tRNA                  | intergenic SNP             |                                                                | T                            | C                         |                       |
| m35                     | PA4221                                                                               | <i>fptA</i>                     | Fe(III)-pyochelin outer membrane receptor precursor | iron transport        | intergenic SNP             | 11                                                             | G                            | A                         |                       |
| m47                     | PA1873                                                                               |                                 | hypothetical protein                                |                       | intergenic 1bp deletion    | 293                                                            | TTTTT                        | TTTT                      |                       |
|                         | PA1874                                                                               |                                 | hypothetical protein                                |                       |                            | 208                                                            |                              |                           |                       |
| m50                     | PA0428                                                                               | <i>(rhIE)</i>                   | probable ATP-dependent RNA helicase                 | transcription         | intergenic 1bp deletion    | 221                                                            | GGGGGGG                      | GGGGGG                    |                       |

| Mutation no. in Fig. 1* | PAO1 annotation no. with 5' untranslated region containing the mutation <sup>†</sup> | Gene name (alternate gene name) | Gene function                  | Functional category | Type of mutation         | Distance from mutation to transcription start site of gene, bp | Nucleotide prior to mutation | Nucleotide after mutation | Notes |
|-------------------------|--------------------------------------------------------------------------------------|---------------------------------|--------------------------------|---------------------|--------------------------|----------------------------------------------------------------|------------------------------|---------------------------|-------|
| m51                     | PA0407                                                                               | <i>gshB</i>                     | glutathione synthetase         |                     | intergenic SNP           | 59                                                             | G                            | A                         |       |
|                         | PA0408                                                                               | <i>pilG</i>                     | twitching motility protein     | virulence, motility |                          | 196                                                            |                              |                           |       |
| s12                     | PA2264                                                                               |                                 | conserved hypothetical protein |                     | intergenic 10bp deletion | 163                                                            | CCGGCGCG<br>GC               | -                         |       |

SNP, single-nucleotide polymorphism.

\*Mutations present in the 96-month isolate, 35, are numbered m1–m68, and mutations present only in intermediate isolates are numbered s1–s17.

<sup>†</sup>Two genes are listed for a single intergenic mutation when both genes are transcribed in opposite orientations and share the intergenic region in their transcription start sites.
