# Supplementary material
Source: PubMed Central journal article supplement (PMC1482519)
Supplement: pnas_0602138103_4.pdf [file pnas_0602138103_4.pdf]

**Table 7. Mutations in genes of CF airways isolates from 29 different patients**

| Mutated gene <sup>†</sup>                      | Nucleotide position mutated in gene | Type of mutation | Nucleotide(s) prior to mutation | Nucleotide(s) after mutation | Amino acid prior to mutation | Amino acid after mutation | Patient no. | Mutated isolate(s), named by patient age (yr) when isolate was collected | Isolates not containing the mutation, named by patient age (yr) when isolate was collected <sup>‡</sup> | Computational prediction of effect on protein function <sup>§</sup> |
|------------------------------------------------|-------------------------------------|------------------|---------------------------------|------------------------------|------------------------------|---------------------------|-------------|--------------------------------------------------------------------------|---------------------------------------------------------------------------------------------------------|---------------------------------------------------------------------|
| transcriptional regulator <i>mexZ</i> (PA2020) |                                     |                  |                                 |                              |                              |                           |             |                                                                          |                                                                                                         |                                                                     |
|                                                | 26                                  | nonsynonymous    | C                               | T                            | S                            | F                         | 10          | 15.4A, 15.4B                                                             | 6.7                                                                                                     | Not tolerated                                                       |
|                                                | 60                                  | 18bp deletion    | CGAGCGGG<br>TTTTCTGG<br>A       | -                            | -                            | -                         | 18          | 11.8, 18.4                                                               | 4.2, 9.0                                                                                                | -                                                                   |
|                                                | 74                                  | nonsynonymous    | T                               | C                            | L                            | P                         | 19          | 22.5                                                                     | 7.2, 16.4                                                                                               | Not tolerated                                                       |
|                                                | 137                                 | nonsynonymous    | G                               | T                            | G                            | V                         | 14          | 13.1B                                                                    | 4.3, 13.1A                                                                                              | Not tolerated                                                       |
|                                                | 139                                 | nonsynonymous    | G                               | C                            | A                            | P                         | 8           | 13.3A                                                                    | 1.1                                                                                                     | Not tolerated                                                       |
|                                                | 145                                 | 3bp deletion     | TAC                             | -                            | -                            | -                         | 9           | 19.7A, 19.7B                                                             | 9.2                                                                                                     | -                                                                   |
|                                                | 231                                 | 14bp deletion    | CCAGGGTG<br>CCGGCGC             | -                            | -                            | -                         | 11          | 15.3                                                                     | 7.3, 13.7                                                                                               | -                                                                   |
|                                                | 256–319                             | 64bp deletion    | -                               | -                            | -                            | -                         | 24          | 22.5                                                                     | 8.5, 17.4                                                                                               | -                                                                   |
|                                                | 308                                 | 1bp deletion     | A                               | -                            | -                            | -                         | 15          | 12.8A, 12.8B                                                             | 5.7                                                                                                     | -                                                                   |
|                                                | 315                                 | 5bp deletion     | G                               | -                            | -                            | -                         | 25          | 14.5                                                                     | 1.2, 21.0                                                                                               | -                                                                   |
|                                                | 337                                 | 13bp deletion    | ACTTGAGGT<br>AGAG               | -                            | -                            | -                         | 22          | 20.0                                                                     | 9.9                                                                                                     | -                                                                   |



| <b>Mutated gene†</b> | <b>Nucleotide position mutated in gene</b> | <b>Type of mutation</b> | <b>Nucleotide(s) prior to mutation</b> | <b>Nucleotide(s) after mutation</b> | <b>Amino acid prior to mutation</b> | <b>Amino acid after mutation</b> | <b>Patient no.</b> | <b>Mutated isolate(s), named by patient age (yr) when isolate was collected</b> | <b>Isolates not containing the mutation, named by patient age (yr) when isolate was collected‡</b> | <b>Computational prediction of effect on protein function§</b> |
|----------------------|--------------------------------------------|-------------------------|----------------------------------------|-------------------------------------|-------------------------------------|----------------------------------|--------------------|---------------------------------------------------------------------------------|----------------------------------------------------------------------------------------------------|----------------------------------------------------------------|
|                      | 97                                         | 11bp deletion           | TCGAAGATC<br>CT                        | -                                   | -                                   | -                                | 20                 | 17.5                                                                            | -                                                                                                  | -                                                              |
|                      | 179                                        | nonsynonymous           | G                                      | A                                   | W                                   | STOP                             | 3                  | 7.3                                                                             | 0.8, 6.8                                                                                           | -                                                              |
|                      | 181                                        | nonsynonymous           | C                                      | T                                   | R                                   | C                                | 12                 | 21.1B                                                                           | 8.6, 21.1A                                                                                         | Not tolerated                                                  |
|                      | 194                                        | nonsynonymous           | A                                      | G                                   | D                                   | G                                | 17                 | 17.7, 22.2                                                                      | 6.6                                                                                                | Not tolerated                                                  |
|                      | 254                                        | nonsynonymous           | C                                      | T                                   | P                                   | L                                | 30                 | 18.5                                                                            | 10.2, 16.8                                                                                         | Not tolerated                                                  |
|                      | 292                                        | nonsynonymous           | C                                      | T                                   | Q                                   | STOP                             | 10                 | 15.4A, 15.4B                                                                    | 6.7                                                                                                | -                                                              |
|                      | 316                                        | nonsynonymous           | T                                      | C                                   | S                                   | P                                | 28                 | 14.8, 17.9                                                                      | 8.2                                                                                                | Tolerated                                                      |
|                      | 341                                        | nonsynonymous           | T                                      | C                                   | L                                   | P                                | 21                 | 15.2                                                                            | 0.5, 10.7, 14.3,<br>19.5                                                                           | Not tolerated                                                  |
|                      | 344                                        | nonsynonymous           | C                                      | T                                   | T                                   | I                                | 8                  | 13.3A                                                                           | 1.1, 13.3B                                                                                         | Tolerated                                                      |
|                      | 350                                        | nonsynonymous           | C                                      | T                                   | P                                   | L                                | 23                 | 14.0                                                                            | 6.2, 10.0                                                                                          | Not tolerated                                                  |
|                      | 355                                        | 2bp insertion           | CA                                     | CACA                                | -                                   | -                                | 13                 | 19.6A, 19.6B                                                                    | 10.8                                                                                               | -                                                              |
|                      | 362                                        | nonsynonymous           | C                                      | A                                   | A                                   | D                                | 17                 | 22.2                                                                            | 6.6, 17.7                                                                                          | Not tolerated                                                  |
|                      | 455                                        | 1bp deletion            | G                                      | -                                   | -                                   | -                                | 6                  | 9.6B                                                                            | 1.0, 9.6A                                                                                          | -                                                              |
|                      | 467                                        | nonsynonymous           | A                                      | G                                   | D                                   | G                                | 30                 | 18.5                                                                            | 10.2, 16.8                                                                                         | Not tolerated                                                  |
|                      | 532                                        | nonsynonymous           | A                                      | G                                   | T                                   | A                                | 21                 | 19.5                                                                            | 0.5, 10.7, 14.3,<br>15.2                                                                           | Not tolerated                                                  |

| Mutated gene <sup>†</sup>                     | Nucleotide position mutated in gene | Type of mutation | Nucleotide(s) prior to mutation | Nucleotide(s) after mutation | Amino acid prior to mutation | Amino acid after mutation | Patient no. | Mutated isolate(s), named by patient age (yr) when isolate was collected | Isolates not containing the mutation, named by patient age (yr) when isolate was collected <sup>‡</sup> | Computational prediction of effect on protein function <sup>§</sup> |
|-----------------------------------------------|-------------------------------------|------------------|---------------------------------|------------------------------|------------------------------|---------------------------|-------------|--------------------------------------------------------------------------|---------------------------------------------------------------------------------------------------------|---------------------------------------------------------------------|
|                                               | 538                                 | nonsynonymous    | C                               | T                            | R                            | W                         | 15          | 12.8A, 12.8B                                                             | 5.7                                                                                                     | Not tolerated                                                       |
|                                               | 561                                 | nonsynonymous    | G                               | A                            | W                            | STOP                      | 27          | 6.4                                                                      | 9.1, 11.4                                                                                               | -                                                                   |
|                                               | 578                                 | nonsynonymous    | C                               | T                            | T                            | I                         | 9           | 19.7A, 19.7B                                                             | 9.2                                                                                                     | Not tolerated                                                       |
|                                               | 608                                 | nonsynonymous    | G                               | A                            | C                            | Y                         | 24          | 22.5                                                                     | 8.5, 17.4                                                                                               | Not tolerated                                                       |
|                                               | 665                                 | nonsynonymous    | C                               | T                            | T                            | I                         | 22          | 20.0                                                                     | 9.9                                                                                                     | Tolerated                                                           |
|                                               | 678                                 | IS insertion     | -                               | -                            | -                            | -                         | 20          | 9.9                                                                      | -                                                                                                       | -                                                                   |
|                                               | 691                                 | nonsynonymous    | G                               | C                            | A                            | P                         | 26          | 8.6                                                                      | 2.9, 13.3                                                                                               | Not tolerated                                                       |
| probable permease of ABC transporter (PA0313) |                                     |                  |                                 |                              |                              |                           |             |                                                                          |                                                                                                         |                                                                     |
|                                               | 259                                 | nonsynonymous    | G                               | A                            | G                            | R                         | 6           | 9.6B                                                                     | 1.0, 9.6A                                                                                               | Not tolerated                                                       |
|                                               | 353                                 | nonsynonymous    | G                               | A                            | R                            | H                         | 29          | 13.5, 14.0                                                               | 5.6                                                                                                     | Not tolerated                                                       |
|                                               | 384                                 | 1bp deletion     | A                               | -                            | Q                            | -                         | 7           | 15.4A                                                                    | 7.8, 15.4B                                                                                              | -                                                                   |
|                                               | 417                                 | nonsynonymous    | G                               | A                            | W                            | STOP                      | 21          | 15.2                                                                     | 0.6, 10.7, 14.3, 19.5                                                                                   | -                                                                   |
|                                               | 419                                 | 1bp insertion    | GGGG                            | GGGGG                        | -                            | -                         | 25          | 14.5                                                                     | 1.2, 21.0                                                                                               | -                                                                   |
|                                               | 483                                 | 9bp insertion    | CAGCCTGAT<br>CAGCCTGAT          | CAGCCTGAT<br>CAGCCTGAT       | -                            | -                         | 8           | 13.3A, 13.3B                                                             | 1.1                                                                                                     | -                                                                   |

| Mutated gene <sup>†</sup> | Nucleotide position mutated in gene | Type of mutation | Nucleotide(s) prior to mutation | Nucleotide(s) after mutation        | Amino acid prior to mutation | Amino acid after mutation | Patient no. | Mutated isolate(s), named by patient age (yr) when isolate was collected | Isolates not containing the mutation, named by patient age (yr) when isolate was collected <sup>‡</sup> | Computational prediction of effect on protein function <sup>§</sup> |
|---------------------------|-------------------------------------|------------------|---------------------------------|-------------------------------------|------------------------------|---------------------------|-------------|--------------------------------------------------------------------------|---------------------------------------------------------------------------------------------------------|---------------------------------------------------------------------|
|                           |                                     |                  |                                 | CAGCCTGAT                           |                              |                           |             |                                                                          |                                                                                                         |                                                                     |
|                           | 483                                 | 9bp insertion    | CAGCCTGAT<br>CAGCCTGAT          | CAGCCTGAT<br>CAGCCTGAT<br>CAGCCTGAT | -                            | -                         | 9           | 19.7A, 19.7B                                                             | 9.2                                                                                                     | -                                                                   |
|                           | 483                                 | 9bp insertion    | CAGCCTGAT<br>CAGCCTGAT          | CAGCCTGAT<br>CAGCCTGAT<br>CAGCCTGAT | -                            | -                         | 11          | 13.7                                                                     | 7.3, 15.3                                                                                               | -                                                                   |
|                           | 483                                 | 9bp insertion    | CAGCCTGAT<br>CAGCCTGAT          | CAGCCTGAT<br>CAGCCTGAT<br>CAGCCTGAT | -                            | -                         | 13          | 19.6A, 19.6B                                                             | 10.8                                                                                                    | -                                                                   |
|                           | 483                                 | 9bp insertion    | CAGCCTGAT<br>CAGCCTGAT          | CAGCCTGAT<br>CAGCCTGAT<br>CAGCCTGAT | -                            | -                         | 15          | 12.8A, 12.8B                                                             | 5.7                                                                                                     | -                                                                   |
|                           | 483                                 | 9bp insertion    | CAGCCTGAT<br>CAGCCTGAT          | CAGCCTGAT<br>CAGCCTGAT<br>CAGCCTGAT | -                            | -                         | 25          | 21.0                                                                     | 1.2, 14.5                                                                                               | -                                                                   |
|                           | 483                                 | 9bp deletion     | CAGCCTGAT<br>CAGCCTGAT          | CAGCCTGAT                           | -                            | -                         | 21          | 14.3                                                                     | 0.6, 10.7, 15.2,<br>19.5                                                                                | -                                                                   |
|                           | 483                                 | 9bp insertion    | CAGCCTGAT<br>CAGCCTGAT          | CAGCCTGAT<br>CAGCCTGAT<br>CAGCCTGAT | -                            | -                         | 30          | 16.8, 18.5                                                               | 10.2                                                                                                    | -                                                                   |

| Mutated gene <sup>†</sup>                                         | Nucleotide position mutated in gene | Type of mutation | Nucleotide(s) prior to mutation | Nucleotide(s) after mutation | Amino acid prior to mutation | Amino acid after mutation | Patient no. | Mutated isolate(s), named by patient age (yr) when isolate was collected | Isolates not containing the mutation, named by patient age (yr) when isolate was collected <sup>‡</sup> | Computational prediction of effect on protein function <sup>§</sup> |
|-------------------------------------------------------------------|-------------------------------------|------------------|---------------------------------|------------------------------|------------------------------|---------------------------|-------------|--------------------------------------------------------------------------|---------------------------------------------------------------------------------------------------------|---------------------------------------------------------------------|
|                                                                   | 538                                 | nonsynonymous    | G                               | A                            | E                            | K                         | 18          | 11.8                                                                     | 4.2, 9.0, 18.4                                                                                          | Not tolerated                                                       |
| RND multidrug efflux membrane fusion protein <i>mexA</i> (PA0425) |                                     |                  |                                 |                              |                              |                           |             |                                                                          |                                                                                                         |                                                                     |
|                                                                   | 352                                 | nonsynonymous    | C                               | T                            | Q                            | STOP                      | 21          | 15.2                                                                     | 0.6, 10.7, 14.3                                                                                         | -                                                                   |
|                                                                   | 379                                 | nonsynonymous    | C                               | T                            | Q                            | STOP                      | 20          | 9.9                                                                      | 17.3                                                                                                    | -                                                                   |
|                                                                   | 479                                 | nonsynonymous    | T                               | G                            | V                            | G                         | 9           | 19.7A, 19.7B                                                             | 9.2                                                                                                     | Not tolerated                                                       |
|                                                                   | 520                                 | nonsynonymous    | A                               | G                            | T                            | A                         | 8           | 13.3A                                                                    | 1.1, 13.3B                                                                                              | Not tolerated                                                       |
|                                                                   | 658                                 | nonsynonymous    | G                               | C                            | E                            | Q                         | 14          | 13.1A, 13.1B                                                             | 4.3                                                                                                     | Tolerated                                                           |
|                                                                   | 658                                 | nonsynonymous    | G                               | T                            | E                            | STOP                      | 14          | 4.3                                                                      | 13.1A, 13.1B                                                                                            | -                                                                   |
|                                                                   | 658                                 | nonsynonymous    | G                               | T                            | E                            | STOP                      | 12          | 8.6, 21.1A, 21.1B                                                        | -                                                                                                       | -                                                                   |
|                                                                   | 768                                 | 1bp deletion     | C                               | -                            | -                            | -                         | 19          | 16.4, 22.5                                                               | 7.2                                                                                                     | -                                                                   |
|                                                                   | 800                                 | nonsynonymous    | A                               | G                            | N                            | S                         | 23          | 6.2                                                                      | 10.0, 14.0                                                                                              | Not tolerated                                                       |
|                                                                   | 812                                 | nonsynonymous    | A                               | G                            | E                            | G                         | 23          | 6.2                                                                      | 10.0, 14.0                                                                                              | Tolerated                                                           |
|                                                                   | 824                                 | nonsynonymous    | G                               | C                            | G                            | A                         | 15          | 12.8A, 12.8B                                                             | 5.7                                                                                                     | Not tolerated                                                       |
|                                                                   | 838                                 | nonsynonymous    | G                               | C                            | A                            | P                         | 20          | 17.3                                                                     | 9.9                                                                                                     | Not tolerated                                                       |
|                                                                   | 878                                 | nonsynonymous    | C                               | A                            | A                            | D                         | 17          | 22.2                                                                     | 6.6, 17.7                                                                                               | Not tolerated                                                       |







| Mutated gene†                                  | Nucleotide position mutated in gene | Type of mutation | Nucleotide(s) prior to mutation | Nucleotide(s) after mutation | Amino acid prior to mutation | Amino acid after mutation | Patient no. | Mutated isolate(s), named by patient age (yr) when isolate was collected | Isolates not containing the mutation, named by patient age (yr) when isolate was collected‡ | Computational prediction of effect on protein function§ |
|------------------------------------------------|-------------------------------------|------------------|---------------------------------|------------------------------|------------------------------|---------------------------|-------------|--------------------------------------------------------------------------|---------------------------------------------------------------------------------------------|---------------------------------------------------------|
|                                                | 142                                 | nonsynonymous    | C                               | T                            | R                            | C                         | 29          | 13.5, 14.0                                                               | 5.6                                                                                         | Not tolerated                                           |
|                                                | 155                                 | nonsynonymous    | C                               | A                            | A                            | D                         | 17          | 22.2                                                                     | 6.6, 17.7                                                                                   | Tolerated                                               |
|                                                | 280                                 | nonsynonymous    | C                               | T                            | P                            | S                         | 23          | 6.2                                                                      | 10.0, 14.0                                                                                  | Tolerated                                               |
|                                                | 304                                 | nonsynonymous    | G                               | T                            | D                            | Y                         | 9           | 19.7A, 19.7B                                                             | 9.2                                                                                         | Not tolerated                                           |
|                                                | 529                                 | nonsynonymous    | A                               | G                            | T                            | A                         | 20          | 17.3                                                                     | 9.9                                                                                         | Not tolerated                                           |
|                                                | 549                                 | 6bp deletion     | GAGTTC                          | -                            | -                            | -                         | 7           | 15.4A                                                                    | 7.8, 15.4B                                                                                  | -                                                       |
|                                                | 730                                 | nonsynonymous    | G                               | A                            | G                            | S                         | 7           | 15.4B                                                                    | 7.8, 15.4A                                                                                  | Not tolerated                                           |
|                                                | 935                                 | nonsynonymous    | T                               | G                            | F                            | C                         | 23          | 10.0, 14.0                                                               | 6.2                                                                                         | Not tolerated                                           |
| transcriptional regulator <i>exsA</i> (PA1713) |                                     |                  |                                 |                              |                              |                           |             |                                                                          |                                                                                             |                                                         |
|                                                | 128                                 | IS insertion     | -                               | -                            | -                            | -                         | 20          | 17.3                                                                     | 9.9                                                                                         | -                                                       |
|                                                | 427                                 | nonsynonymous    | G                               | A                            | E                            | K                         | 2           | 12.8, 13.0                                                               | 6.3                                                                                         | Not tolerated                                           |
|                                                | 463                                 | 3bp insertion    | GGGG                            | GGGGGGG                      | -                            | -                         | 22          | 20.0                                                                     | 9.9                                                                                         | -                                                       |
|                                                | 467                                 | nonsynonymous    | C                               | T                            | P                            | L                         | 2           | 13.0                                                                     | 12.8, 6.3                                                                                   | Tolerated                                               |
|                                                | 596                                 | nonsynonymous    | C                               | T                            | T                            | I                         | 23          | 14.0                                                                     | 6.2, 10.0                                                                                   | Tolerated                                               |
|                                                | 676                                 | nonsynonymous    | C                               | T                            | H                            | Y                         | 23          | 10.0                                                                     | 6.2, 14.0                                                                                   | Not tolerated                                           |
|                                                | 727                                 | nonsynonymous    | G                               | C                            | A                            | P                         | 27          | 11.4                                                                     | 6.4, 9.1                                                                                    | Not tolerated                                           |

| Mutated gene†                                                                                 | Nucleotide position mutated in gene | Type of mutation | Nucleotide(s) prior to mutation | Nucleotide(s) after mutation | Amino acid prior to mutation | Amino acid after mutation | Patient no. | Mutated isolate(s), named by patient age (yr) when isolate was collected | Isolates not containing the mutation, named by patient age (yr) when isolate was collected‡ | Computational prediction of effect on protein function§ |
|-----------------------------------------------------------------------------------------------|-------------------------------------|------------------|---------------------------------|------------------------------|------------------------------|---------------------------|-------------|--------------------------------------------------------------------------|---------------------------------------------------------------------------------------------|---------------------------------------------------------|
|                                                                                               | 730                                 | nonsynonymous    | G                               | A                            | G                            | S                         | 14          | 13.1A, 13.1B                                                             | 4.3                                                                                         | Not tolerated                                           |
| probable acyl-CoA dehydrogenase (PA0506)                                                      |                                     |                  |                                 |                              |                              |                           |             |                                                                          |                                                                                             |                                                         |
|                                                                                               | 578                                 | nonsynonymous    | G                               | A                            | G                            | D                         | 22          | 20.0                                                                     | 9.9                                                                                         | Not tolerated                                           |
|                                                                                               | 783                                 | 2bp deletion     | AC                              | -                            | -                            | -                         | 20          | 17.3                                                                     | 9.9                                                                                         | -                                                       |
|                                                                                               | 1091                                | nonsynonymous    | T                               | A                            | L                            | Q                         | 17          | 17.7, 22.2                                                               | 6.6                                                                                         | Tolerated                                               |
|                                                                                               | 1285                                | nonsynonymous    | C                               | G                            | Q                            | E                         | 27          | 9.1                                                                      | 6.4, 11.4                                                                                   | Not tolerated                                           |
|                                                                                               | 1525                                | nonsynonymous    | G                               | C                            | A                            | P                         | 7           | 15.4B                                                                    | 7.8, 15.4A                                                                                  | Not tolerated                                           |
|                                                                                               | 1651                                | nonsynonymous    | A                               | G                            | T                            | A                         | 21          | 19.5                                                                     | 0.5, 10.7, 14.3, 15.2                                                                       | Tolerated                                               |
| *probable methyltransferase involved in chemosensory signal transduction <i>wspF</i> (PA3703) |                                     |                  |                                 |                              |                              |                           |             |                                                                          |                                                                                             |                                                         |
|                                                                                               | 37-63                               | 27-bp deletion   | GTCGAGGC<br>GCTGCGCC            | -                            | -                            | -                         | 20          | 17.3                                                                     | 9.9                                                                                         | -                                                       |

| Mutated gene†                                        | Nucleotide position mutated in gene | Type of mutation | Nucleotide(s) prior to mutation | Nucleotide(s) after mutation | Amino acid prior to mutation | Amino acid after mutation | Patient no. | Mutated isolate(s), named by patient age (yr) when isolate was collected | Isolates not containing the mutation, named by patient age (yr) when isolate was collected‡ | Computational prediction of effect on protein function§ |
|------------------------------------------------------|-------------------------------------|------------------|---------------------------------|------------------------------|------------------------------|---------------------------|-------------|--------------------------------------------------------------------------|---------------------------------------------------------------------------------------------|---------------------------------------------------------|
|                                                      |                                     |                  | GCGCGCTG<br>GCC                 |                              |                              |                           |             |                                                                          |                                                                                             |                                                         |
|                                                      | 494                                 | nonsynonymous    | C                               | G                            | S                            | W                         | 16          | 7.0                                                                      | 23.4                                                                                        | Not tolerated                                           |
|                                                      | 761                                 | nonsynonymous    | A                               | G                            | D                            | G                         | 10          | 6.7                                                                      | 15.4A, 15.4B                                                                                | Not tolerated                                           |
|                                                      | 800-801                             | 16-bp insertion  | -                               | TCGCCACGC<br>CAATAAT         | -                            | -                         | 17          | 17.7, 22.2                                                               | 6.6                                                                                         | -                                                       |
|                                                      | 895                                 | nonsynonymous    | C                               | T                            | Q                            | STOP                      | 23          | 10.0, 14.0                                                               | 6.2                                                                                         | -                                                       |
|                                                      | 955                                 | nonsynonymous    | C                               | T                            | Q                            | STOP                      | 25          | 14.5                                                                     | 1.2, 21.0                                                                                   | -                                                       |
| *RNA polymerase sigma-54 factor <i>rpoN</i> (PA4462) |                                     |                  |                                 |                              |                              |                           |             |                                                                          |                                                                                             |                                                         |
|                                                      | 99                                  | 1-bp deletion    | CC                              | C                            | -                            | -                         | 13          | 19.6A, 19.6B                                                             | 10.8                                                                                        | -                                                       |
|                                                      | 324                                 | nonsynonymous    | G                               | A                            | W                            | STOP                      | 9           | 19.7A, 19.7B                                                             | 9.2                                                                                         | -                                                       |
|                                                      | 1019                                | 3-bp insertion   | -                               | AGC                          | -                            | S                         | 17          | 17.7                                                                     | 6.6, 22.2                                                                                   | -                                                       |

| Mutated gene <sup>†</sup>                                             | Nucleotide position mutated in gene | Type of mutation | Nucleotide(s) prior to mutation | Nucleotide(s) after mutation | Amino acid prior to mutation | Amino acid after mutation | Patient no. | Mutated isolate(s), named by patient age (yr) when isolate was collected | Isolates not containing the mutation, named by patient age (yr) when isolate was collected <sup>‡</sup> | Computational prediction of effect on protein function <sup>§</sup> |
|-----------------------------------------------------------------------|-------------------------------------|------------------|---------------------------------|------------------------------|------------------------------|---------------------------|-------------|--------------------------------------------------------------------------|---------------------------------------------------------------------------------------------------------|---------------------------------------------------------------------|
|                                                                       | 1279-1280                           | 2-bp deletion    | GT                              | -                            | -                            | -                         | 30          | 16.8, 18.5                                                               | 10.2                                                                                                    | -                                                                   |
|                                                                       | 1346                                | nonsynonymous    | C                               | T                            | A                            | V                         | 2           | 12.8, 13.0                                                               | 6.3                                                                                                     | Not tolerated                                                       |
| *transcriptional regulator of flagella synthesis <i>fleQ</i> (PA1097) |                                     |                  |                                 |                              |                              |                           |             |                                                                          |                                                                                                         |                                                                     |
|                                                                       | 230                                 | nonsynonymous    | A                               | G                            | D                            | G                         | 13          | 19.6A                                                                    | 10.8, 19.6B                                                                                             | Tolerated                                                           |
|                                                                       | 235                                 | nonsynonymous    | T                               | C                            | Y                            | H                         | 30          | 18.5                                                                     | 10.2, 16.8                                                                                              | Tolerated                                                           |
|                                                                       | 364                                 | nonsynonymous    | C                               | T                            | Q                            | STOP                      | 11          | 15.3                                                                     | 7.3, 13.7                                                                                               | -                                                                   |
|                                                                       | 433                                 | nonsynonymous    | A                               | G                            | S                            | G                         | 21          | 19.5                                                                     | 0.5, 10.7, 14.3, 15.2                                                                                   | Not tolerated                                                       |
|                                                                       | 1135                                | nonsynonymous    | G                               | A                            | G                            | R                         | 12          | 21.1A                                                                    | -                                                                                                       | Not tolerated                                                       |
| transcriptional regulator <i>mexT</i> (PA2492)                        |                                     |                  |                                 |                              |                              |                           |             |                                                                          |                                                                                                         |                                                                     |
|                                                                       | 468                                 | nonsynonymous    | C                               | A                            | P                            | Q                         | 17          | 22.2                                                                     | 6.6, 17.7                                                                                               | Not tolerated                                                       |

| Mutated gene <sup>†</sup>                                | Nucleotide position mutated in gene | Type of mutation | Nucleotide(s) prior to mutation | Nucleotide(s) after mutation | Amino acid prior to mutation | Amino acid after mutation | Patient no. | Mutated isolate(s), named by patient age (yr) when isolate was collected | Isolates not containing the mutation, named by patient age (yr) when isolate was collected <sup>‡</sup> | Computational prediction of effect on protein function <sup>§</sup> |
|----------------------------------------------------------|-------------------------------------|------------------|---------------------------------|------------------------------|------------------------------|---------------------------|-------------|--------------------------------------------------------------------------|---------------------------------------------------------------------------------------------------------|---------------------------------------------------------------------|
|                                                          | 659                                 | nonsynonymous    | G                               | A                            | D                            | N                         | 13          | 19.6A, 19.6B                                                             | 10.8                                                                                                    | Not tolerated                                                       |
|                                                          | 893                                 | nonsynonymous    | G                               | C                            | G                            | R                         | 27          | 9.1, 11.4                                                                | 6.4                                                                                                     | Tolerated                                                           |
|                                                          | 977                                 | nonsynonymous    | G                               | A                            | A                            | T                         | 7           | 15.4A                                                                    | 7.8                                                                                                     | Not tolerated                                                       |
| *probable transcriptional regulator <i>nalD</i> (PA3574) |                                     |                  |                                 |                              |                              |                           |             |                                                                          |                                                                                                         |                                                                     |
|                                                          | 26-31                               | 1-bp deletion    | AAAAAA                          | AAAAA                        | -                            | -                         | 13          | 19.6A, 19.6B                                                             | 10.8                                                                                                    | -                                                                   |
|                                                          | 123                                 | synonymous       | G                               | A                            | G                            | G                         | 23          | 6.2                                                                      | 10.0, 14.0                                                                                              | -                                                                   |
|                                                          | 160                                 | nonsynonymous    | A                               | C                            | K                            | Q                         | 26          | 8.6, 13.3                                                                | 2.9                                                                                                     | None                                                                |
| *β-lactamase expression regulator <i>ampD</i> (PA4522)   |                                     |                  |                                 |                              |                              |                           |             |                                                                          |                                                                                                         |                                                                     |
|                                                          | 78-88                               | 11-bp deletion   | AGGGGACG<br>CGG                 | -                            | -                            | -                         | 10          | 15.4A, 15.4B                                                             | 6.7                                                                                                     | -                                                                   |
|                                                          | 83                                  | nonsynonymous    | A                               | G                            | D                            | G                         | 22          | 20.0                                                                     | 9.9                                                                                                     | Tolerated                                                           |





| Mutated gene <sup>†</sup>                   | Nucleotide position mutated in gene | Type of mutation | Nucleotide(s) prior to mutation | Nucleotide(s) after mutation | Amino acid prior to mutation | Amino acid after mutation | Patient no. | Mutated isolate(s), named by patient age (yr) when isolate was collected | Isolates not containing the mutation, named by patient age (yr) when isolate was collected <sup>‡</sup> | Computational prediction of effect on protein function <sup>§</sup> |
|---------------------------------------------|-------------------------------------|------------------|---------------------------------|------------------------------|------------------------------|---------------------------|-------------|--------------------------------------------------------------------------|---------------------------------------------------------------------------------------------------------|---------------------------------------------------------------------|
|                                             | 913                                 | nonsynonymous    | A                               | G                            | R                            | G                         | 8           | 13.3A                                                                    | 1.1, 13.3B                                                                                              | None                                                                |
| probable transcriptional regulator (PA2312) |                                     |                  |                                 |                              |                              |                           |             |                                                                          |                                                                                                         |                                                                     |
|                                             | 306                                 | synonymous       | G                               | A                            | A                            | A                         | 7           | 15.4A                                                                    | 7.8, 15.4B                                                                                              | -                                                                   |

IS, insertion element.

<sup>†</sup>Genes with names preceded by an asterisk were chosen for sequencing on the basis of other studies. The remaining 24 genes were mutated in the 96-month isolate of patient 1.

<sup>‡</sup>For each mutation, all isolates listed are clonally related and are from the same patient.

<sup>§</sup>Nonsynonymous mutations that are predicted to cause partial or complete loss of function are labeled "Not tolerated." No prediction was made when fewer than four homologs were available.
