# Supplementary material
Source: PubMed Central journal article supplement (PMC1482519)
Supplement: pnas_0602138103_5.pdf [file pnas_0602138103_5.pdf]

**Table 8. Intergenic mutations in CF airways isolates from 29 different patients**

| Type of mutation         | Gene with 5' untranslated region containing the mutation <sup>†‡</sup>      | Distance from mutation to transcription start site of gene, bp | Nucleotide prior to mutation | Nucleotide after mutation | Patient no. | Mutated isolate(s), named by patient age (yr) when isolate was collected | Isolate(s) not containing the mutation, named by patient age (yr) when isolate was collected <sup>§</sup> |
|--------------------------|-----------------------------------------------------------------------------|----------------------------------------------------------------|------------------------------|---------------------------|-------------|--------------------------------------------------------------------------|-----------------------------------------------------------------------------------------------------------|
| intergenic SNP           | probable permease of ABC transporter (PA0313)                               | 12                                                             | T                            | C                         | 10          | 15.4A, 15.4B                                                             | 6.7                                                                                                       |
| intergenic 1-bp deletion | *transcriptional regulator <i>vfr</i> (PA0652)                              | 105-110                                                        | GGGGGG                       | GGGGG                     | 21          | 14.3                                                                     | 0.5, 10.7, 15.2, 19.5                                                                                     |
|                          | hypothetical protein (PA0653)                                               | 162-167                                                        |                              |                           |             |                                                                          |                                                                                                           |
| intergenic SNP           | probable acyl-CoA dehydrogenase (PA0507)                                    | 23                                                             | C                            | T                         | 4           | 9.1A                                                                     | 3.0, 9.1B                                                                                                 |
| intergenic SNP           | RND multidrug efflux membrane fusion protein <i>mexE</i> precursor (PA2493) | 115                                                            | C                            | T                         | 21          | 19.5                                                                     | 0.5, 10.7, 14.3, 15.2                                                                                     |
| intergenic SNP           | probable major facilitator superfamily (MFS) transporter (PA3573)           | 317                                                            | T                            | C                         | 19          | 7.2                                                                      | 16.4, 22.5                                                                                                |

| Type of mutation        | Gene with 5' untranslated region containing the mutation <sup>†</sup>   | Distance from mutation to transcription start site of gene, bp | Nucleotide prior to mutation | Nucleotide after mutation | Patient no. | Mutated isolate(s), named by patient age (yr) when isolate was collected | Isolate(s) not containing the mutation, named by patient age (yr) when isolate was collected <sup>§</sup> |
|-------------------------|-------------------------------------------------------------------------|----------------------------------------------------------------|------------------------------|---------------------------|-------------|--------------------------------------------------------------------------|-----------------------------------------------------------------------------------------------------------|
|                         | *probable transcriptional regulator <i>nalD</i> (PA3574)                | 48                                                             |                              |                           |             |                                                                          |                                                                                                           |
| intergenic SNP          | probable aldehyde dehydrogenase (PA0366)                                | 227                                                            | A                            | G                         | 20          | 17.3                                                                     | 9.9                                                                                                       |
|                         | probable transcriptional regulator (PA0367)                             | 63                                                             |                              |                           |             |                                                                          |                                                                                                           |
| intergenic 1bp deletion | hypothetical protein (PA1333)                                           | 41                                                             | CCCCCC                       | CCCCC                     | 20          | 17.3                                                                     | 9.9                                                                                                       |
| Intergenic SNP          | * transcriptional regulator of anaerobic metabolism <i>anr</i> (PA1544) | 65                                                             | C                            | T                         | 23          | 6.2                                                                      | 10.0, 14.0                                                                                                |
|                         | hypothetical protein (PA1545)                                           | 181                                                            |                              |                           |             |                                                                          |                                                                                                           |
| intergenic SNP          | transcriptional regulator <i>rhIR</i> (PA3477)                          | 103                                                            | C                            | T                         | 14          | 13.1B                                                                    | 4.3, 13.1A                                                                                                |

SNP, single-nucleotide polymorphism.

<sup>†</sup>Genes with names preceded by an asterisk were chosen for sequencing on the basis of other studies. The remaining 24 genes were mutated in the 96-month isolate of patient 1.

<sup>‡</sup>Two genes are listed for a single intergenic mutation when both genes are transcribed in opposite orientations and share the intergenic region in their transcription start sites.

<sup>§</sup>For each mutation, all isolates listed are clonally related and are from the same patient.
